# Supplementary material for: Metabolite Profiling Reveals the Effect of Dietary Rubus coreanus Vinegar on Ovariectomy-Induced Osteoporosis in a Rat Model
Source: MDPI journal article supplement (doi:10.3390/molecules21020149), 2016-01-26
Supplement: s1 [file s1]

# Supplementary Materials: Metabolite Profiling Reveals the Effect of Dietary *Rubus coreanus* Vinegar on Ovariectomy-Induced Osteoporosis in a Rat Model

Mee Youn Lee, Hyang Yeon Kim, Digar Singh, Soo Hwan Yeo, Seong Yeol Baek, Yoo Kyoung Park and Choong Hwan Lee

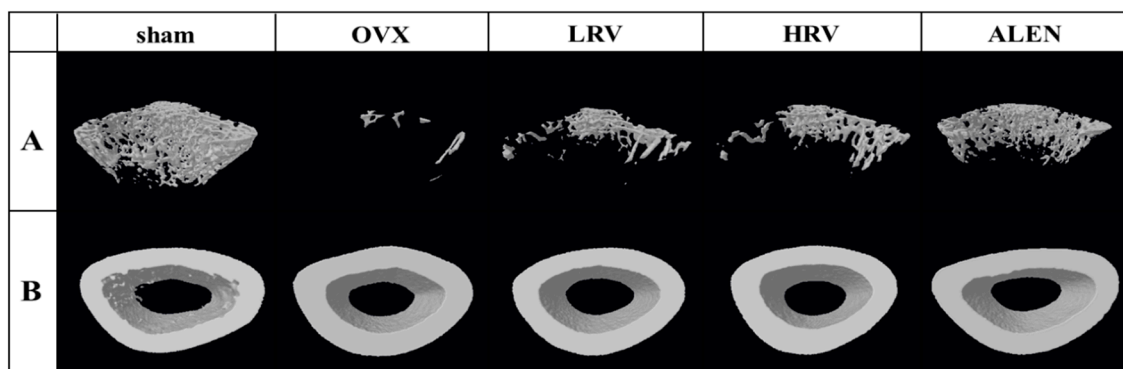

**Figure S1.** Representative  $\mu$ CT images of the trabecular bone (A) and the cortical bone (B). (From left to right) sham, sham-operated control; OVX, ovariectomized rat without treatment; LRV, ovariectomized rat treated with low-dose RC vinegar; HRV, ovariectomized rat treated with high-dose RC vinegar; ALN, ovariectomized rat treated with alendronate.

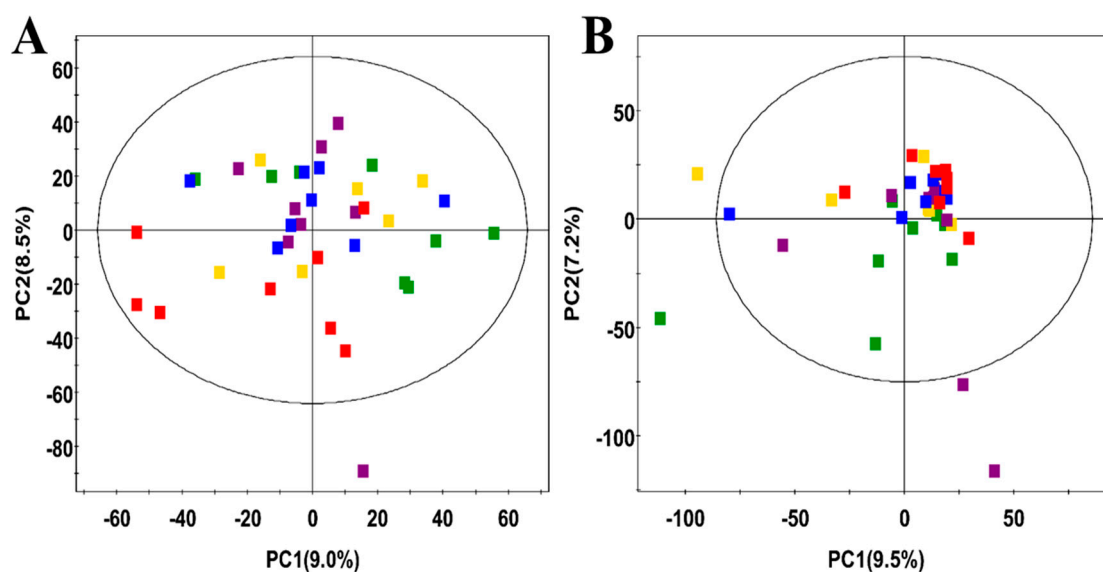

**Figure S2.** Principal component analysis (PCA) score plots derived from GC-TOF-MS (A) and UPLC-Q-TOF-MS (B) in ovariectomized rat groups. (■; sham-operated control, ■; ovariectomized rat without treatment, ■; ovariectomized rat treated with low-dose RC vinegar, ■; ovariectomized rat treated with high-dose RC vinegar, ■; ovariectomized rat treated with alendronate).
